# Supplementary material for: Association between Diet Quality and Risk of Type 2 Diabetes Mellitus in Patients with Coronary Heart Disease: Findings from the CORDIOPREV Study
Source: MDPI journal article supplement (doi:10.3390/nu16081249), 2024-04-22
Supplement: s1 [file s1]

# Association between diet quality and risk of type 2 diabetes in patients with coronary disease: findings from the CORDIOPREV study

Lorenzo Rivas-García *et al*

## SUPPLEMENTARY MATERIAL

**Supplemental Figure 1S.** Flow chart of the patients included in the analysis.

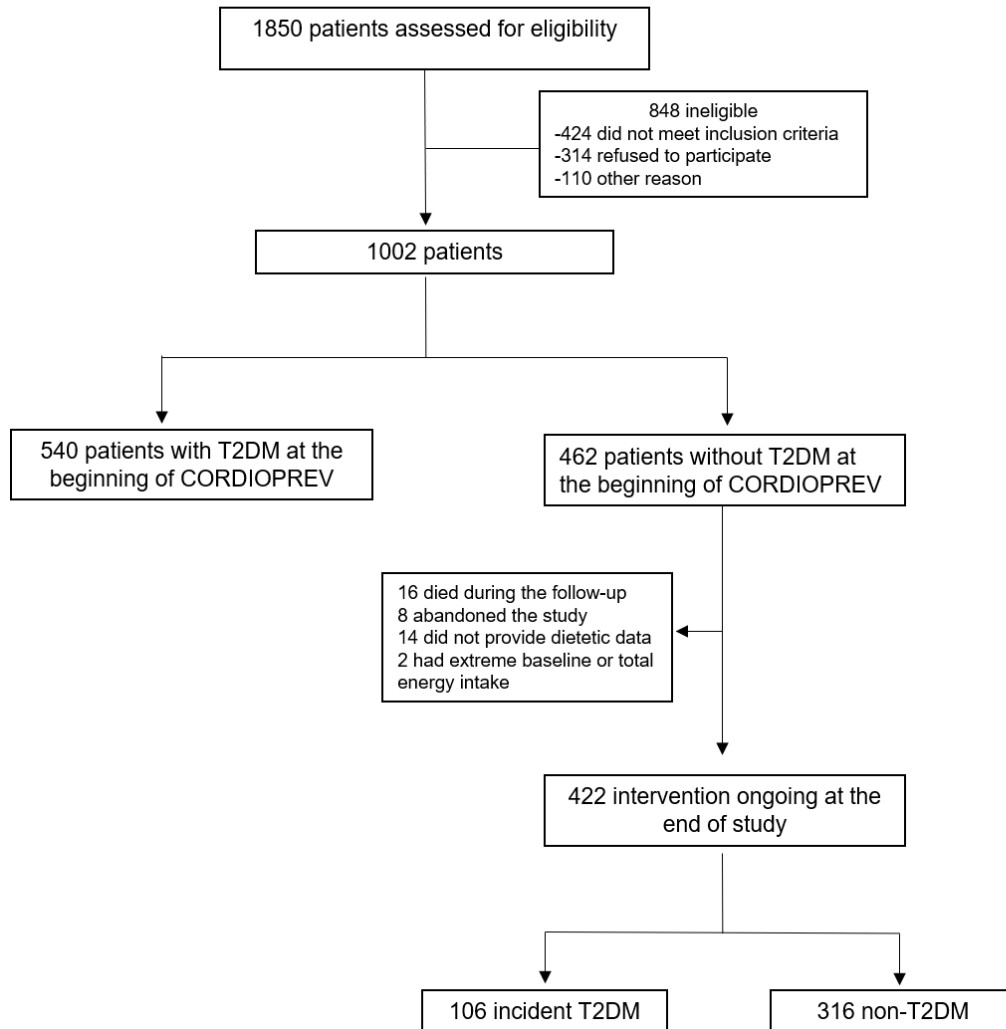

# Association between diet quality and risk of type 2 diabetes in patients with coronary disease: findings from the CORDIOPREV study

Lorenzo Rivas-García *et al*

**Supplemental Figure S2.** 10-Step method for estimating added sugars content in food items described by *Louie et al.*

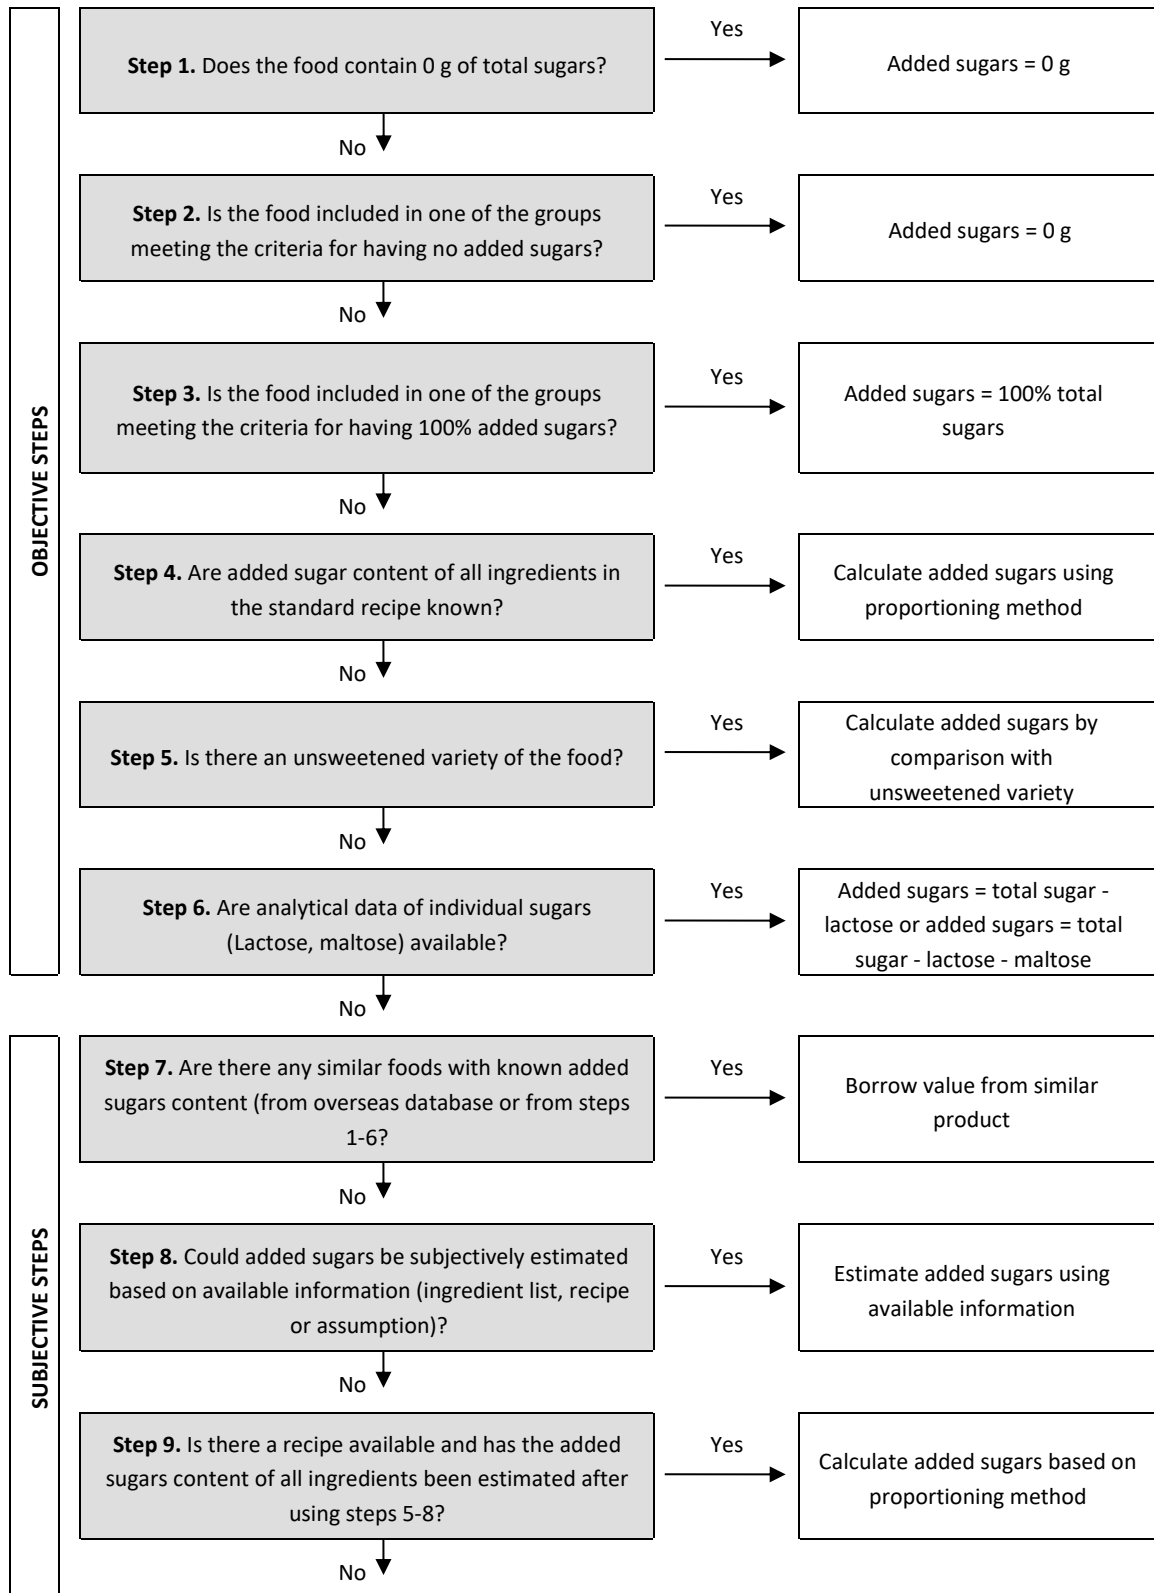

Association between diet quality and risk of type 2 diabetes in patients with coronary disease: findings from the CORDIOPREV study

Lorenzo Rivas-García *et al*

Step 10. Assign 50% of the total sugar as added sugars

Supplemental Figure S3. Detailed 10-Step method for estimating added sugars content in food items in the CordioPrev Study

|                                                                                                                                                                                                                                                                                                                                                                                                                                                                                   |
|-----------------------------------------------------------------------------------------------------------------------------------------------------------------------------------------------------------------------------------------------------------------------------------------------------------------------------------------------------------------------------------------------------------------------------------------------------------------------------------|
| Step 1. All foods with the total sugar content of 0g were assigned 0g of added sugars (n=30)                                                                                                                                                                                                                                                                                                                                                                                      |
| <div>(1.a) Eggs (n=1)</div> <div>(1.b) Fresh meat, liver, offal, cured ham (n=9)</div> <div>(1.c) Fresh fish and seafood (n=8)</div> <div>(1.d) Fats and oils (n=10)</div> <div>(1.e) Salt (n=1)</div> <div>(1.f) Tea (n=1)</div>                                                                                                                                                                                                                                                 |
| Step 2. All foods unprocessed or minimally processed meeting the criteria for having no added sugars were assigned 0g of added sugars (n=54)                                                                                                                                                                                                                                                                                                                                      |
| <div>(2.a) Non-sugar-sweetened milk and dairy products (n=9)</div> <div>(2.b) Fresh vegetables, potatoes and vegetable recipes (n=16)</div> <div>(2.c) Fresh fruit, dried fruit and fresh fruit juices (without added sugar) (n=14)</div> <div>(2.d) Nuts (n=2)</div> <div>(2.e) Legumes (fresh and dried) (n=4)</div> <div>(2.f) All plain cereal grains, pastas, rice and flours (n=4)</div> <div>(2.g) All plain bread (n=2)</div> <div>(2.h) All spices and herbs (n=3)</div> |
| Step 3. Foods containing minimal intrinsic sugars were assigned 100% of total sugars as added sugar (n=33)                                                                                                                                                                                                                                                                                                                                                                        |

# Association between diet quality and risk of type 2 diabetes in patients with coronary disease: findings from the CORDIOPREV study

Lorenzo Rivas-García *et al*

|                                                                                                                                                                                                                                                                                                                                                               |
|---------------------------------------------------------------------------------------------------------------------------------------------------------------------------------------------------------------------------------------------------------------------------------------------------------------------------------------------------------------|
| <p>(3.a) Sugar, syrups and honey (n=2)</p> <p>(3.b) Breakfast cereals (n=2)</p> <p>(3.c) Savoury biscuits, sweet biscuits, donuts, muffins, cakes and pastries (n=10)</p> <p>(3.d) Regular soft drinks (n=2)</p> <p>(3.e) Instant coffee and decaffeinated (n=2)</p> <p>(3.f) Processed meats (n=4)</p> <p>(3.g) Non-sweetened alcoholic beverages (n=11)</p> |
| <p>Step 4. Calculation based on standard recipe used in the food composition database, where added sugar content of all ingredients was available from steps 1–3 (n=4)</p>                                                                                                                                                                                    |
| <p>Example- Added sugar content determined for canned fruits in syrup:<br/> Added sugar (g/100g) = Total sugar (g/100g) – (total sugar content of raw fruit (g/100g) * %of raw fruit in the canned fruits = 21.5g – (9g*80/100) = 21.5g – 7.2g = 14.3g</p>                                                                                                    |
| <p>Step 5. Calculation based on comparison with values from the unsweetened variety (n=0).</p>                                                                                                                                                                                                                                                                |
| <p>Step 6. Decision based on analytical data of lactose content (n=1).</p>                                                                                                                                                                                                                                                                                    |
| <p>Lactose subtracted from total sugars. Example – Sweetened low-fat yogurt: added sugar content (g/100g) calculated as total sugars (6.3g) – lactose (4.4g)</p>                                                                                                                                                                                              |
| <p>Step 7. Use “borrowed” values from similar products from steps 1–6 or from overseas databases (n=6)</p>                                                                                                                                                                                                                                                    |
| <p>Example – Milkshakes: added sugars estimated based on the added sugar content of <i>Nestle Nesquik Chocolate Milk</i>, 50% of the total sugars.</p>                                                                                                                                                                                                        |
| <p>Step 8. Subjective estimation of added sugars based on the ingredient list of packed foods (n=3)</p>                                                                                                                                                                                                                                                       |
| <p>Example – Custard: added sugars estimated based on the ingredient list of <i>Danone Vanilla Custard</i> (80% milk, sugar, modified starch, stabilizers). 3.5g were considered as intrinsic sugars (lactose in milk) and deducted from the total sugars (11.8g)</p>                                                                                         |
| <p>Step 9. Calculation based on the standard recipe that includes ingredients with values assigned at steps 5–8, using the proportioning method (n=1).</p>                                                                                                                                                                                                    |
| <p>Example – Homemade meatballs: ingredients ratio in the standard recipe checked (minced pork/beef meat, egg, garlic, breadcrumbs, parsley, virgin olive oil) and added sugars estimated as 0g</p>                                                                                                                                                           |

## **Association between diet quality and risk of type 2 diabetes in patients with coronary disease: findings from the CORDIOPREV study**

Lorenzo Rivas-García *et al*

Step 10. Assign 50% of total sugars as added sugar (n=5).

Example – Precooked food products (e.g., ready-to-eat lasagne, croquettes or nuggets)

# Association between diet quality and risk of type 2 diabetes in patients with coronary disease: findings from the CORDIOPREV study

Lorenzo Rivas-García *et al*

**Supplemental Table S1.** Alternative Healthy Eating Index 2010 (AHEI-2010) components and criteria for scoring

| Components of the AHEI-2010                     | Criteria for minimum score (0) <sup>a</sup>    | Criteria for maximum score (10) <sup>a</sup>         |
|-------------------------------------------------|------------------------------------------------|------------------------------------------------------|
| 1. Vegetables <sup>b</sup>                      | 0 servings/day                                 | ≥5 servings/day                                      |
| 2. Fruit <sup>c</sup>                           | 0 servings/day                                 | ≥4 servings/day                                      |
| 3. Whole grains <sup>d</sup>                    |                                                | Women: 75 grams/day<br>Men: 90 grams/day             |
| 4. Sugar-sweetened beverages <sup>e</sup>       | ≥1 servings/day                                | 0 servings/day                                       |
| 5. Nuts and legumes <sup>f</sup>                | 0 servings/day                                 | ≥1 servings/day                                      |
| 6. Red/processed meat <sup>g</sup>              | ≥1.5 servings/day                              | 0 servings/day                                       |
| 7. <i>Trans</i> fats                            | ≥4 % of energy                                 | ≤0.5 % of energy                                     |
| 8. Long-chain (n-3) fats (EPA+DHA) <sup>h</sup> | 0 mg/day                                       | 250 mg/day                                           |
| 9. Polyunsaturated fats                         | ≤2 % of energy                                 | ≥10 % of energy                                      |
| 10. Sodium <sup>i</sup>                         | Lowest decile                                  | Highest decile                                       |
| 11. Alcohol <sup>j</sup>                        | Women: ≥2.5 drinks/day<br>Men: ≥3.5 drinks/day | Women: 0.5-1.5 drinks/day<br>Men: 0.5-2.0 drinks/day |
| Total score                                     | 0 points                                       | 110 points                                           |

<sup>a</sup> Intermediate intakes are scored proportionally between 0 and 10, except for whole grains.

<sup>b</sup> All types of vegetables, except potatoes. One serving = 0.5 cup of vegetables or 1 cup of green leafy vegetables (1 cup = 236.59g).

<sup>c</sup> Only fresh and whole fruit (not canned or dried fruit or juice). One serving = 1 medium piece of fruit or 0.5 cup of berries.

<sup>d</sup> Whole wheat bread, brown rice, whole pasta, and whole breakfast cereals. One serving of a 100% whole grain product (i.e., 0.5 cup of brown rice) = 15 to 20g of whole grains (per dry weight).

<sup>e</sup> Natural and commercial juices, regular and light cola, soda, and tonic water. One serving or drink = 200mL.

<sup>f</sup> Legumes include different types of beans, chickpeas, lentils, and peas. Nuts include walnuts, almonds, peanuts, hazelnuts, pistachios, and pine nuts. One serving of legumes = 0.5 cup. One serving of nuts = 30g.

<sup>g</sup> Red meats include pork, beef, cow, and lamb. Processed meats include cured ham, cooked ham, salami, sausages, chorizo, pork liver pate, hamburgers, meatballs, and bacon. One serving of red meat = 120g. One serving of processed meat = 45g.

<sup>h</sup> EPA, Eicosapentaenoic acid; DHA, Docosahexaenoic acid. The cut-off for optimal intake (250mg/day) can be achieved by consuming 2 servings of 120g of fish per week, with special attention to oily fish.

<sup>i</sup> Sodium intake is expressed in mg/day. The cut-offs for sodium are based on deciles of intake in the study population.

<sup>j</sup> No alcohol intake receives 2.5 points. One drink = 100mL of wine, 330mL of beer, or 50mL of liquor.

## Association between diet quality and risk of type 2 diabetes in patients with coronary disease: findings from the CORDIOPREV study

Lorenzo Rivas-García *et al*

**Supplemental Figure S4.** Effect of the dietary intervention on NRF9.3 and diabetes status. Patients who became T2DM during the first year of intervention were excluded.

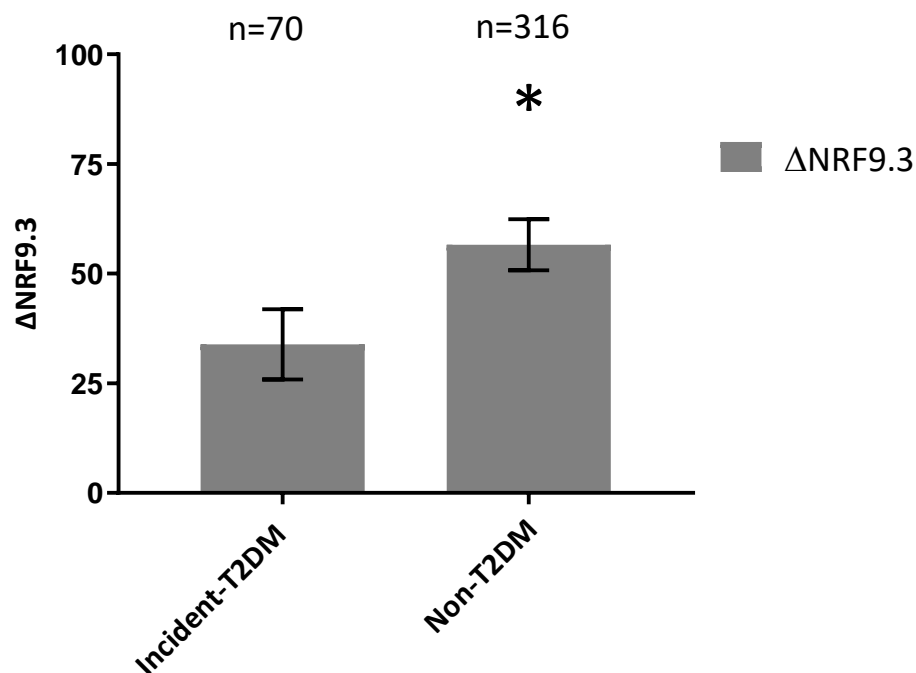

Data are presented as  $\Delta$ changes of NRF9.3 produced between post- and pre-intervention  $\pm$  SEM.

Variables were compared using the analysis of variance (univariate ANOVA) adjusted by age, sex, statin treatment, smoking habits, BMI, LDL, HDL, TG, HOMA-IR, ISI, DI and IGI.

Incident-T2DM (n = 70) and Non-T2DM (n = 316). Differences were considered to be significant when  $p < 0.05$ . \*Significant differences between incident-T2DM and Non-T2DM.

Abbreviation: NRF9.3, Nutrient-Rich Food index 9.3; BMI, Body mass index; LDL, Low-density lipoprotein; HDL, high-density lipoprotein; TG, tryglicerides; HOMA-

## **Association between diet quality and risk of type 2 diabetes in patients with coronary disease: findings from the CORDIOPREV study**

Lorenzo Rivas-García *et al*

IR, homeostatic model assessment; ISI, insulin sensitivity index; DI, disposition index; IGI, insulinogenic index.



**Association between diet quality and risk of type 2 diabetes in patients with coronary disease: findings from the CORDIOPREV study**

Lorenzo Rivas-García *et al*

**Supplemental Figure S5.** Probability of T2DM development by COX analysis

according to the tertiles of  $\Delta$ NRF9.3. Patients who became T2DM during the first year of intervention were excluded.

(A) unadjusted model; (B) adjusted model controlled for sex, statins, age, BMI, LDL, smoking habits, HDL, TG. C fully adjusted model controlled for sex, statins, age, BMI, LDL, smoking habits, HDL, TG., HOMA-IR, ISI, DI and IGI. Reference was the Tertile 1 (lowest). The hazard ratio (HR) between groups were calculated. Abbreviation: BMI, Body mass index; LDL, Low-density lipoprotein; HDL, high-density lipoprotein; TG, Tryglicerides, HOMA-IR, homeostatic model assessment; ISI, insulin sensitivity index; DI, disposition index; IGI, insulinogenic index.

A

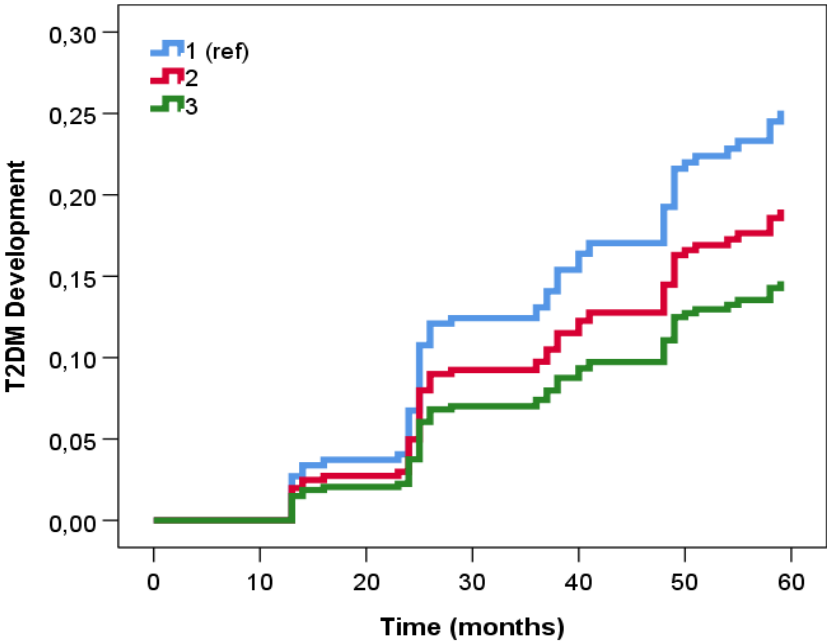

| Tertiles | HR | p-value | 95% CI for HR |       |
|----------|----|---------|---------------|-------|
|          |    |         | Lower         | Upper |

**Association between diet quality and risk of type 2 diabetes in patients with coronary disease: findings from the CORDIOPREV study**

Lorenzo Rivas-García *et al*

|                |      |        |      |      |
|----------------|------|--------|------|------|
| <b>1 (ref)</b> | 1.00 |        | 1.00 | 1.00 |
| <b>2</b>       | 1.33 | 0.372  | 0.71 | 2.51 |
| <b>3</b>       | 1.83 | 0.046* | 1.01 | 3.30 |

**B**

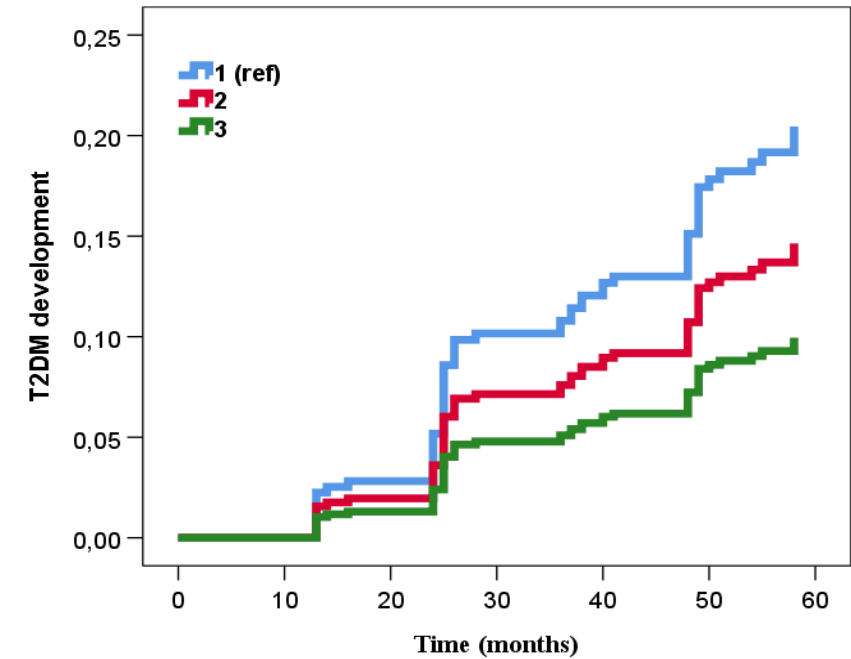

| Tertiles       | HR   | p-value | 95% CI for HR |       |
|----------------|------|---------|---------------|-------|
|                |      |         | Lower         | Upper |
| <b>1 (ref)</b> | 1.00 |         | 1.00          | 1.00  |
| <b>2</b>       | 1.51 | 0.253   | 0.75          | 3.06  |
| <b>3</b>       | 2.18 | 0.022*  | 1.12          | 4.27  |
